# Supplementary material for: MicroRNA-34a: A Key Regulator in the Hallmarks of Renal Cell Carcinoma
Source: Oxid Med Cell Longev. 2017 Sep 20;2017:3269379. doi: 10.1155/2017/3269379 (PMC5632457; doi:10.1155/2017/3269379)
Supplement: Supplementary file 3 [file 3269379.f3.xlsx]

## Sheet: miRNA-Target interactions
Supplementary Table S4. Experimentally supported miR-34a-5p functional annotation
Series	KEGG pathway	p-value	#genes
1	MicroRNAs in cancer (rno05206)	3.71774e-45	79
2	Fatty acid biosynthesis (hsa00061)	4.5197e-09	5
3	Proteoglycans in cancer (hsa05205)	1.04805e-07	71
4	Adherens junction (hsa04520)	4.06317e-07	34
5	Cell cycle (hsa04110)	4.73156e-06	54
6	Glioma (hsa05214)	2.87392e-05	29
7	Thyroid cancer (hsa05216)	4.01166e-05	17
8	Fatty acid metabolism (hsa01212)	5.8828e-05	15
9	Bladder cancer (hsa05219)	5.8828e-05	23
10	Transcriptional misregulation in cancer(rno05202)	5.8828e-05	68
11	Chronic myeloid leukemia (hsa05220)	8.74047e-05	34
12	Colorectal cancer (hsa05210)	9.34528e-05	30
13	Melanoma (hsa05218)	0.000138209	32
14	Pancreatic cancer (hsa05212)	0.000144352	34
15	Other types of O-glycan biosynthesis (hsa00514)	0.000174851	13
16	Hepatitis B (hsa05161)	0.000184244	53
17	Non-small cell lung cancer (hsa05223)	0.000184244	28
18	Pathways in cancer (hsa05200)	0.000231944	115
19	Alcoholism (hsa05034)	0.00045552	68
20	Glycosphingolipid biosynthesis - lacto and neolacto series (hsa00601)	0.00106988	9
21	Thyroid hormone signaling pathway (hsa04919)	0.00106988	46
22	Endometrial cancer (hsa05213)	0.00130324	24
23	Regulation of actin cytoskeleton (hsa04810)	0.00134542	72
24	Prostate cancer (hsa05215)	0.00147978	39
25	DNA replication (hsa03030)	0.00165683	17
26	Viral carcinogenesis (hsa05203)	0.00203898	70
27	Central carbon metabolism in cancer (hsa05230)	0.00203898	28
28	p53 signaling pathway (hsa04115)	0.0031974	31
29	Renal cell carcinoma (hsa05211)	0.00384281	28
30	Progesterone-mediated oocyte maturation(hsa04914)	0.00792493	35
31	HTLV-I infection (hsa05166)	0.00873619	85
32	Acute myeloid leukemia (hsa05221)	0.0093939	24
33	Endocytosis (hsa04144)	0.00972939	67
34	Dorso-ventral axis formation (hsa04320)	0.0166154	14
35	Bacterial invasion of epithelial cells (hsa05100)	0.0208821	29
36	MAPK signaling pathway (hsa04010)	0.0224918	80
37	Oocyte meiosis (hsa04114)	0.0321664	39
38	mTOR signaling pathway (hsa04150)	0.0321664	24
39	HIF-1 signaling pathway (hsa04066)	0.0322136	37
40	Shigellosis (hsa05131)	0.0425327	25
41	Focal adhesion (hsa04510)	0.0463609	67
