# Supplementary material for: MicroRNA-34a: A Key Regulator in the Hallmarks of Renal Cell Carcinoma
Source: Oxid Med Cell Longev. 2017 Sep 20;2017:3269379. doi: 10.1155/2017/3269379 (PMC5632457; doi:10.1155/2017/3269379)
Supplement: Supplementary file 5 [file 3269379.f5.xlsx]

## Sheet: KEGG pathways
GO_id	Term	Number of Genes	p-value	p-value of FDR	p-value of Bonferroni	MET	E2F3	SOX2	TGFB3	DFFA	TP53INP2	Bcl2	Tp53	TGFB1	VEGFA
5200	Pathways in cancer	7	2.47e-11	7.1e-09	7.1e-09
5212	Pancreatic cancer	5	4.97e-11	7.13e-09	1.43e-08
5161	Hepatitis B	5	3.3e-09	2.74e-07	9.48e-07
5206	MicroRNAs in cancer	5	3.81e-09	2.74e-07	1.09e-06
5210	Colorectal cancer	4	1.12e-08	6.45e-07	3.22e-06
5211	Renal cell carcinoma	4	1.8e-08	8.63e-07	5.18e-06
5220	Chronic myeloid leukemia	4	2.45e-08	1e-06	7.03e-06
4110	Cell cycle	4	2.38e-07	8.54e-06	6.83e-05
5219	Bladder cancer	3	6.48e-07	2.07e-05	0.000186
5144	Malaria	3	1.26e-06	3.62e-05	0.000362
5205	Proteoglycans in cancer	4	2.51e-06	6.54e-05	0.000719
5166	HTLV-I infection	4	4.32e-06	9.57e-05	0.00124
5218	Melanoma	3	4.33e-06	9.57e-05	0.00124
4060	Cytokine-cytokine receptor interaction	4	5.04e-06	0.000103	0.00145
4210	Apoptosis	3	7.85e-06	0.00013	0.00225
5222	Small cell lung cancer	3	7.85e-06	0.00013	0.00225
5215	Prostate cancer	3	8.13e-06	0.00013	0.00233
5323	Rheumatoid arthritis	3	8.13e-06	0.00013	0.00233
4151	PI3K-Akt signaling pathway	4	1.39e-05	0.00021	0.00398
5145	Toxoplasmosis	3	1.86e-05	0.000268	0.00535
4390	Hippo signaling pathway	3	4.12e-05	0.000563	0.0118
5152	Tuberculosis	3	6.48e-05	0.000846	0.0186
4144	Endocytosis	3	9.3e-05	0.00116	0.0267
4510	Focal adhesion	3	0.000108	0.00129	0.031
4010	MAPK signaling pathway	3	0.000205	0.00236	0.059
5014	Amyotrophic lateral sclerosis (ALS)	2	0.00026	0.00287	0.0747
5223	Non-small cell lung cancer	2	0.000304	0.00323	0.0871
5214	Glioma	2	0.000388	0.00396	0.111
5321	Inflammatory bowel disease (IBD)	2	0.0004	0.00396	0.115
5140	Leishmaniasis	2	0.000496	0.00474	0.142
4350	TGF-beta signaling pathway	2	0.000617	0.00571	0.177
5410	Hypertrophic cardiomyopathy (HCM)	2	0.000699	0.00627	0.201
5414	Dilated cardiomyopathy	2	0.000805	0.007	0.231
5142	Chagas disease (American trypanosomiasis)	2	0.000957	0.00808	0.275
4066	HIF-1 signaling pathway	2	0.0011	0.00894	0.316
5146	Amoebiasis	2	0.00112	0.00894	0.322
4722	Neurotrophin signaling pathway	2	0.00137	0.0106	0.393
4068	FoxO signaling pathway	2	0.00149	0.0112	0.427
5202	Transcriptional misregulation in cancer	2	0.00276	0.0203	0.791
5169	Epstein-Barr virus infection	2	0.00364	0.0261	1
4015	Rap1 signaling pathway	2	0.00422	0.0296	1
4014	Ras signaling pathway	2	0.00485	0.0332	1
5160	Hepatitis C	1	1	1	1
5120	Epithelial cell signaling in Helicobacter pylori infection	1	1	1	1
5168	Herpes simplex infection	1	1	1	1
5162	Measles	1	1	1	1
4064	NF-kappa B signaling pathway	1	1	1	1
4115	p53 signaling pathway	1	1	1	1
4520	Adherens junction	1	1	1	1
5203	Viral carcinogenesis	1	1	1	1
4360	Axon guidance	1	1	1	1
5213	Endometrial cancer	1	1	1	1
4261	Adrenergic signaling in cardiomyocytes	1	1	1	1
4919	Thyroid hormone signaling pathway	1	1	1	1
4150	mTOR signaling pathway	1	1	1	1
4310	Wnt signaling pathway	1	1	1	1
5217	Basal cell carcinoma	1	1	1	1
5216	Thyroid cancer	1	1	1	1
4380	Osteoclast differentiation	1	1	1	1
4672	Intestinal immune network for IgA production	1	1	1	1
4141	Protein processing in endoplasmic reticulum	1	1	1	1
4932	Non-alcoholic fatty liver disease (NAFLD)	1	1	1	1
5016	Huntington's disease	1	1	1	1
4370	VEGF signaling pathway	1	1	1	1
4725	Cholinergic synapse	1	1	1	1
5100	Bacterial invasion of epithelial cells	1	1	1	1
